# Supplementary material for: Structural analysis of the SRP Alu domain from Plasmodium falciparum reveals a non-canonical open conformation
Source: PubMed Central journal article supplement (PMC8137916; doi:10.1038/s42003-021-02132-y), 2021-05-20
Supplement: 42003_2021_2132_MOESM1_ESM.pdf [file 42003_2021_2132_MOESM1_ESM.pdf]

# SUPPLEMENTARY INFORMATION

## **Structural analysis of the SRP Alu domain from *Plasmodium falciparum* reveals a non-canonical open conformation**

Komal Soni<sup>1</sup>, Georg Kempf<sup>1</sup>, Karen Manalastas-Cantos<sup>2</sup>, Astrid Hendricks<sup>1</sup>, Dirk Flemming<sup>1</sup>, Julien Guizetti<sup>3</sup>, Bernd Simon<sup>4</sup>, Friedrich Frischknecht<sup>3</sup>, Dmitri I. Svergun<sup>2</sup>, Klemens Wild<sup>1</sup>, Irmgard Sinning<sup>1\*</sup>

### Contents

|                               |    |
|-------------------------------|----|
| Supplementary Figure 1 .....  | 2  |
| Supplementary Figure 2 .....  | 3  |
| Supplementary Figure 3 .....  | 4  |
| Supplementary Figure 4 .....  | 5  |
| Supplementary Figure 5 .....  | 6  |
| Supplementary Figure 6 .....  | 6  |
| Supplementary Figure 7 .....  | 7  |
| Supplementary Figure 8 .....  | 8  |
| Supplementary Figure 9 .....  | 8  |
| Supplementary Table 1 .....   | 9  |
| Supplementary Table 2 .....   | 10 |
| Supplementary Table 3 .....   | 11 |
| Supplementary Table 4 .....   | 11 |
| Supplementary References..... | 12 |

## Supplementary Figure 1

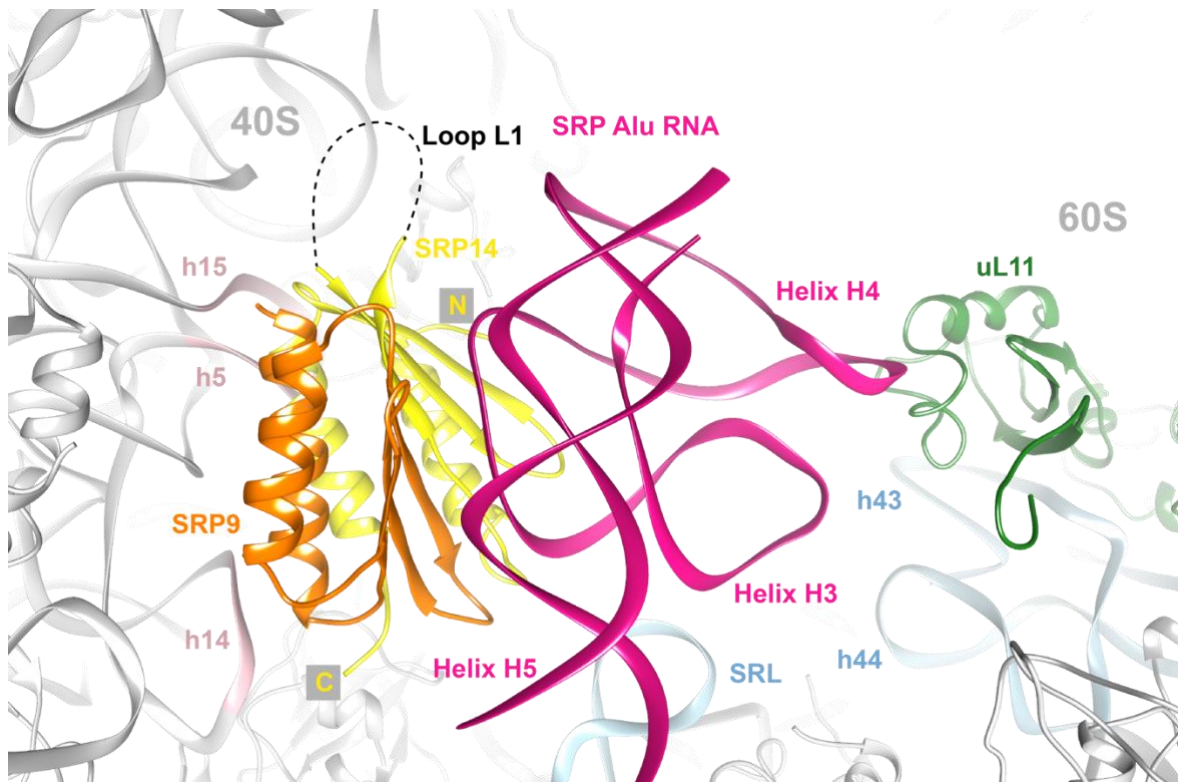

**Supplementary Fig. 1:** Cryo-EM reconstruction of a mammalian SRP-ribosome complex Binding mode of a mammalian SRP Alu domain with its two interfaces to the 40S and 60S subunits shown<sup>1</sup> (PDB: 3JAJ). SRP Alu RNA, SRP9 and SRP14 are shown in magenta, orange and yellow respectively. SRP14 mainly contacts helices h5 and h15 of 18S rRNA, while SRP9 additionally contacts helix h14 (contacts shown in light pink). The N- and C-termini of SRP14 are marked and its flexible internal loop L1 is shown with dashes. 60S uL11 protein which interacts with SRP Alu RNA is shown in green. Additionally, helices h43, h44 and sarcin-ricin loop (SRL) of the 28S rRNA that are in close proximity to the Alu RNA are colored in light blue.

## Supplementary Figure 2

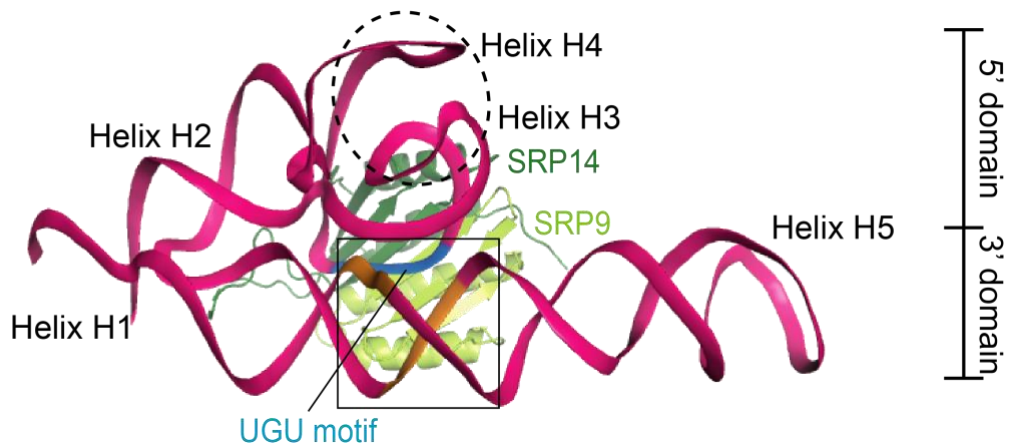

### **Supplementary Fig. 2:** Structural features of canonical SRP Alu domains

Structural details of a chimeric SRP Alu domain with SRP9/14 proteins from *H. sapiens* and Alu RNA from *P. horikoshii*<sup>2</sup> shown, highlighting the overall conserved architecture of the domain (PDB: 4UYK). The UGU motif is indicated in blue and bases of the 3' domain involved in stabilizing contacts between 5' and 3' domains are shown in orange and boxed. The loop-loop pseudoknot between helices H3 and H4 is marked with a dashed circle.

## Supplementary Figure 3

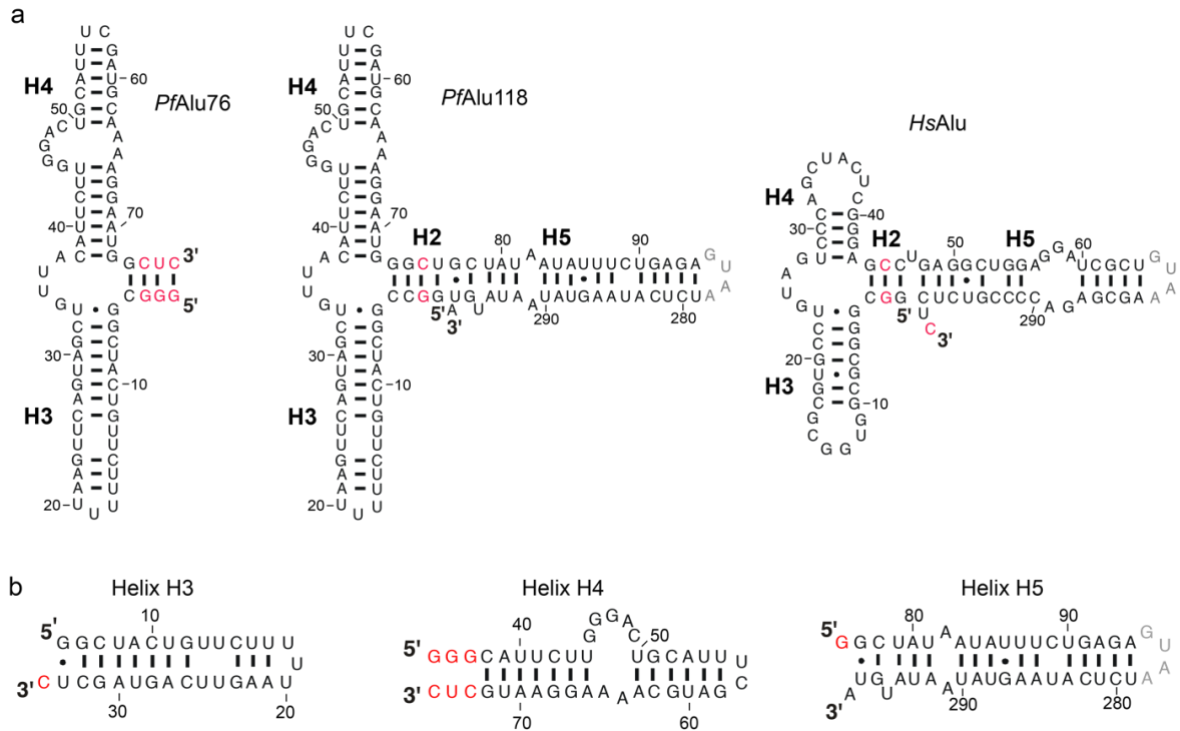

### Supplementary Fig. 3: Constructs of *Pf*SRP Alu RNA

**a** 76 and 118 nucleotide RNA constructs from *Plasmodium falciparum* are shown on the left and the Alu RNA construct from *Homo sapiens* is presented on the right. **b** Individual helices H3, H4 and H5 derived from *Pf*Alu118 RNA for NMR studies are shown. Representative base pairing between the RNA bases as obtained from previous predictions<sup>3</sup> and SRPDB (<https://rth.dk/resources/mp/SRPDB/>) is shown. Nucleotides colored in red are either point mutations inserted for 3'-Hammerhead ribozyme self-cleavage or for efficient transcription by T7 RNA polymerase. The S domain is always replaced by a GUAA tetraloop (colored in gray).

## Supplementary Figure 4

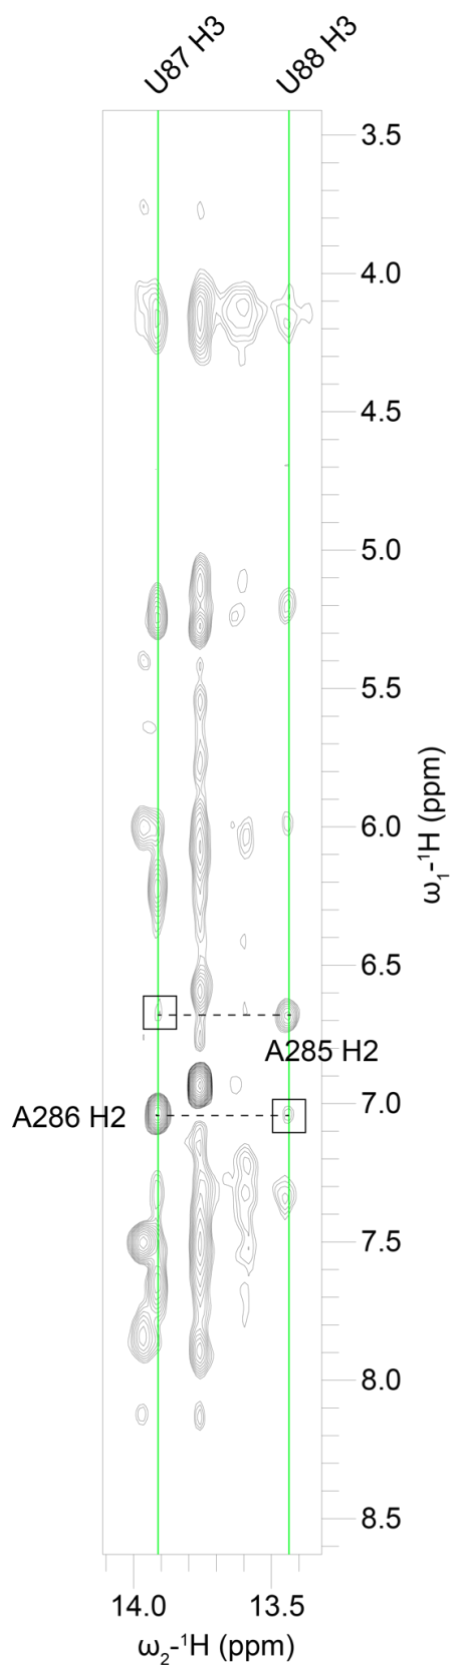

**Supplementary Fig. 4:** Assignment of helix H5 U88 imino proton  
Zoom-in of the imino region of two dimensional  $^1\text{H}, ^1\text{H}$ -NOESY spectra of helix H5 with strips corresponding to U87 and U88 H3 imino protons marked in green. Cross-peaks between A286 H2 proton and U88 imino and A285 H2 proton and U87 imino are labeled.

## Supplementary Figure 5

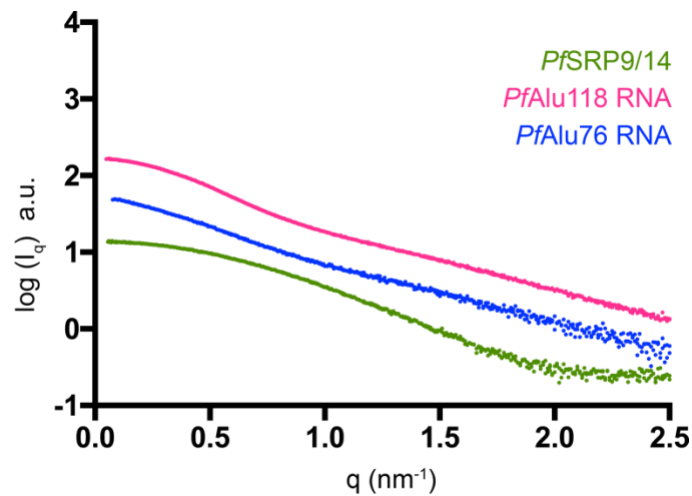

**Supplementary Fig. 5:** SAXS profiles of the *P. falciparum* Alu domain protein and RNA components  
SAXS profiles of PfSRP9/14 (green), PfAlu118 RNA (magenta) and PfAlu76 RNA (blue) plotted as  $\log(I_q)$  versus  $q$ . a.u. represents arbitrary units.

## Supplementary Figure 6

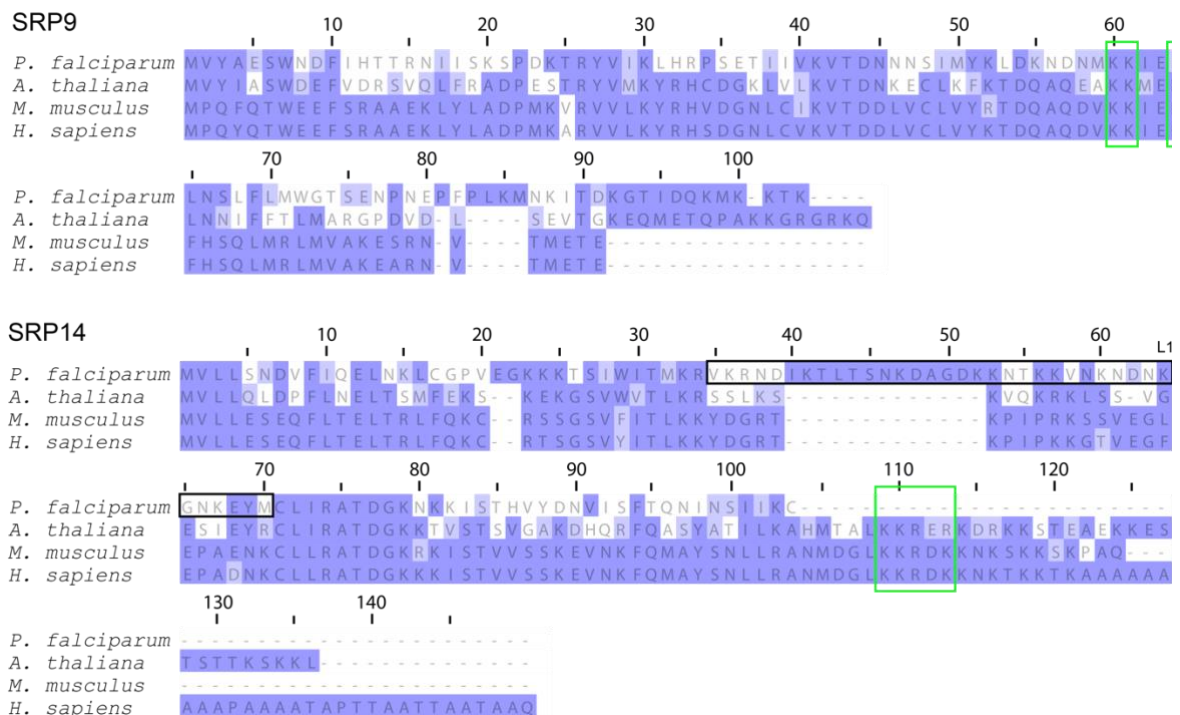

**Supplementary Fig. 6:** Multiple sequence alignment of SRP9/14  
Cross-species alignment of SRP9 and SRP14 are shown. Residues are colored according to Blosom62 based coloring in Jalview<sup>4</sup>. Residues in *HsSRP9/14* shown to be required for elongation arrest activity are boxed in green<sup>5,6</sup>. The extended loop L1 in *P. falciparum* SRP14 is boxed in black.

## Supplementary Figure 7

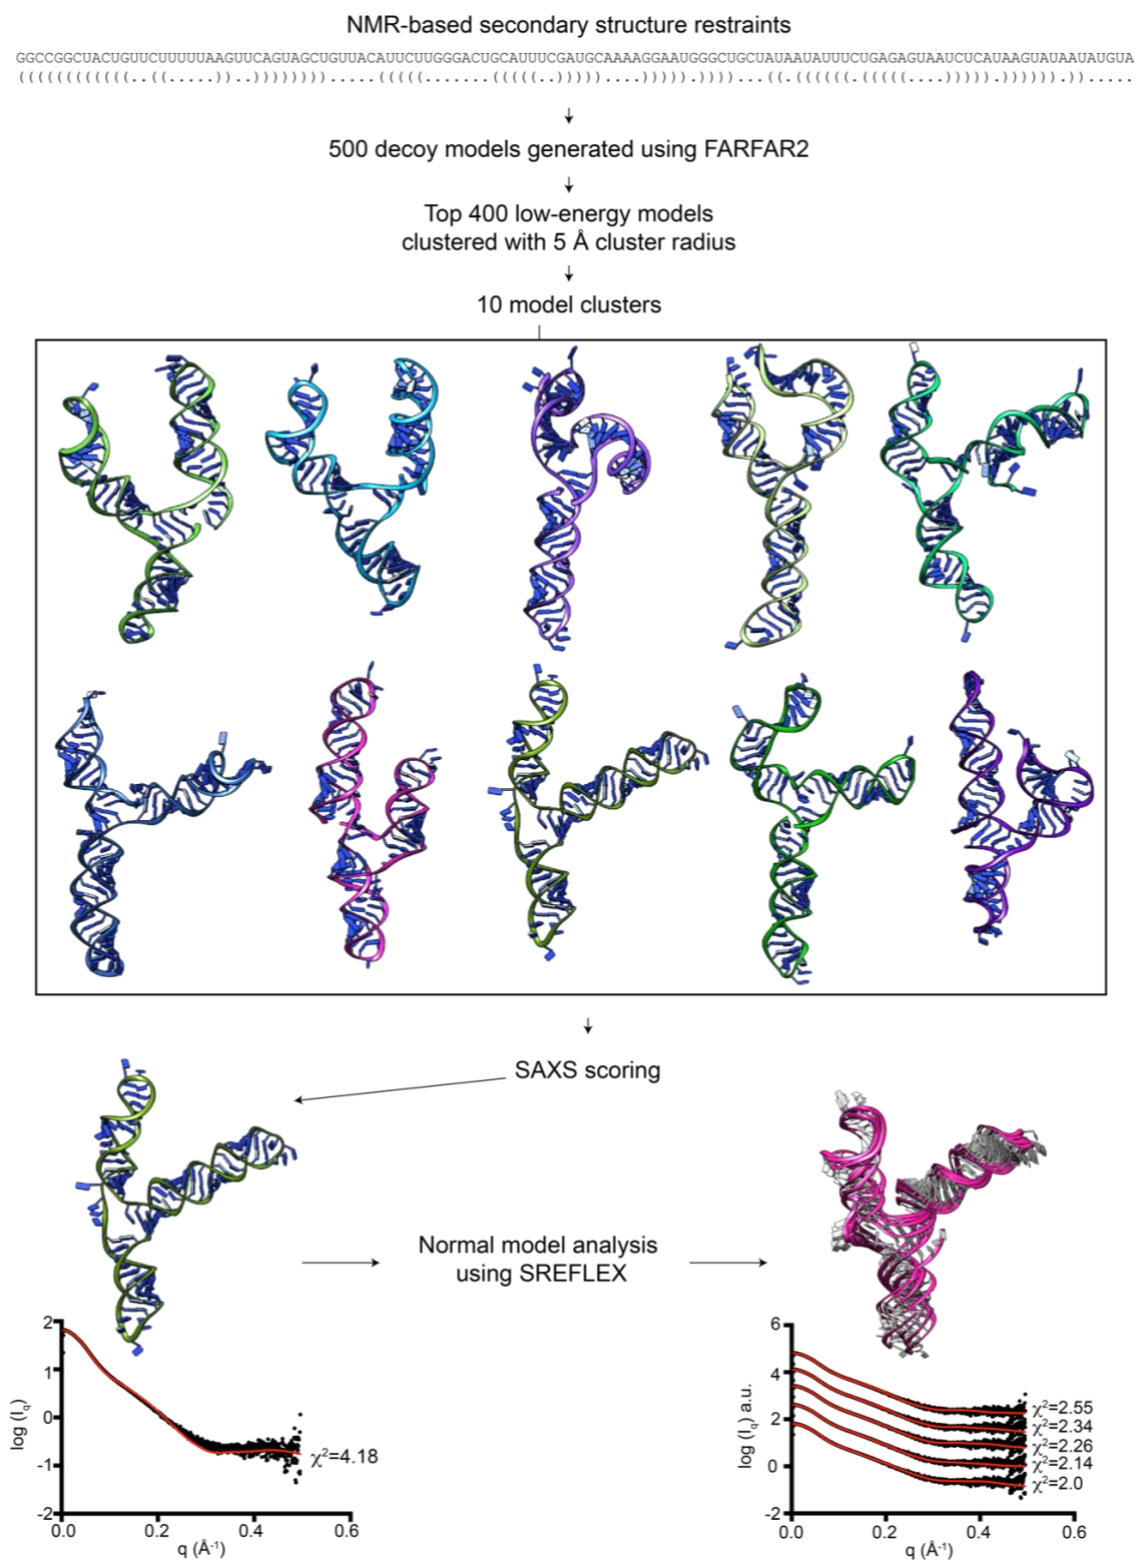

**Supplementary Fig. 7:** Schematic of NMR-SAXS based RNA modeling using the FARFAR2 webserver

NMR-based secondary structure restraints are used as input to the FARFAR2<sup>7</sup> modeling webserver to generate 500 decoy models, of which 400 lowest energy models are used for clustering to produce 10 model clusters. The clusters are further scored using SAXS and the best scoring cluster is further subjected to normal mode analysis using SREFLEX<sup>8</sup> to generate 5 models, which better fit the experimental SAXS data. SAXS-based scoring is performed using CRY SOL<sup>9</sup>.  $\chi^2$  fitting values of the experimental SAXS and back-calculated SAXS profiles of the different models are presented.

## Supplementary Figure 8

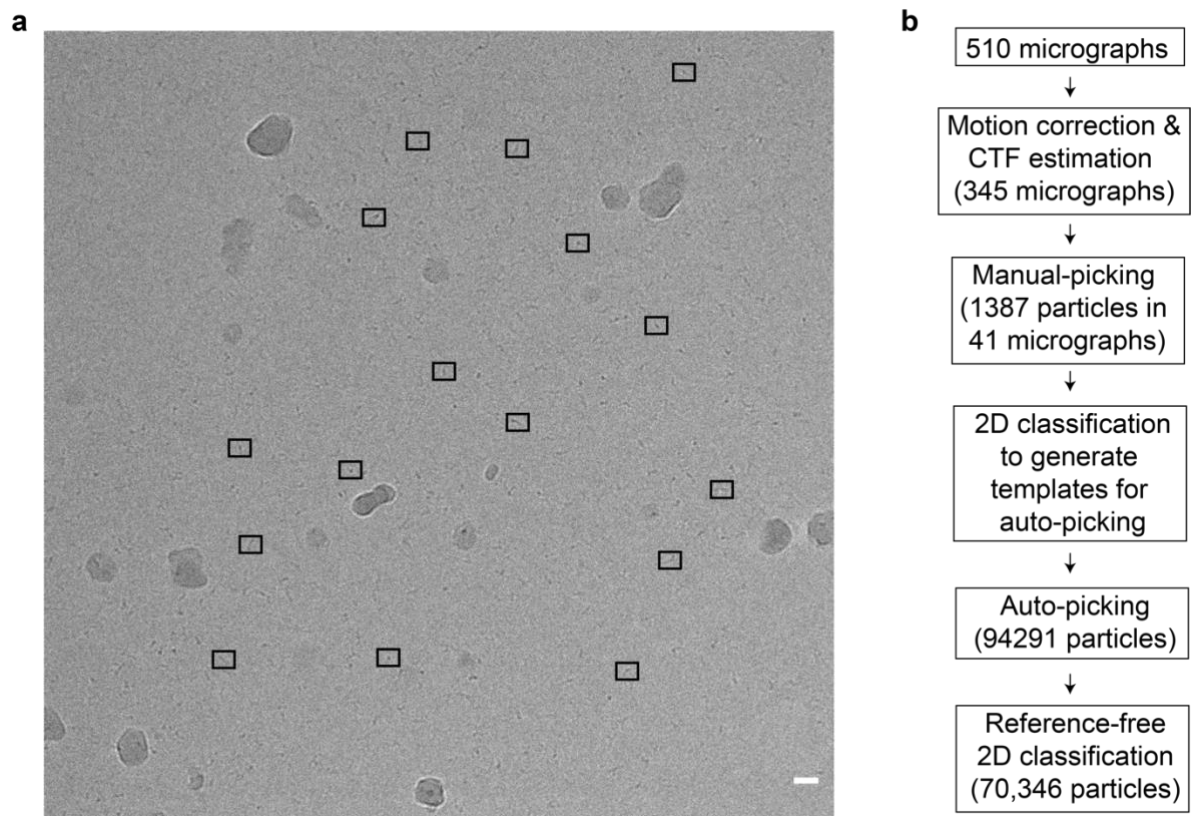

**Supplementary Fig. 8:** Cryo-EM processing workflow

**a** A motion-corrected EM-micrograph with representative *PfAlu118* RNA particles boxed. The scale bar represents 200 Å. **b** Workflow of cryo-EM data processing in RELION 3.1.

## Supplementary Figure 9

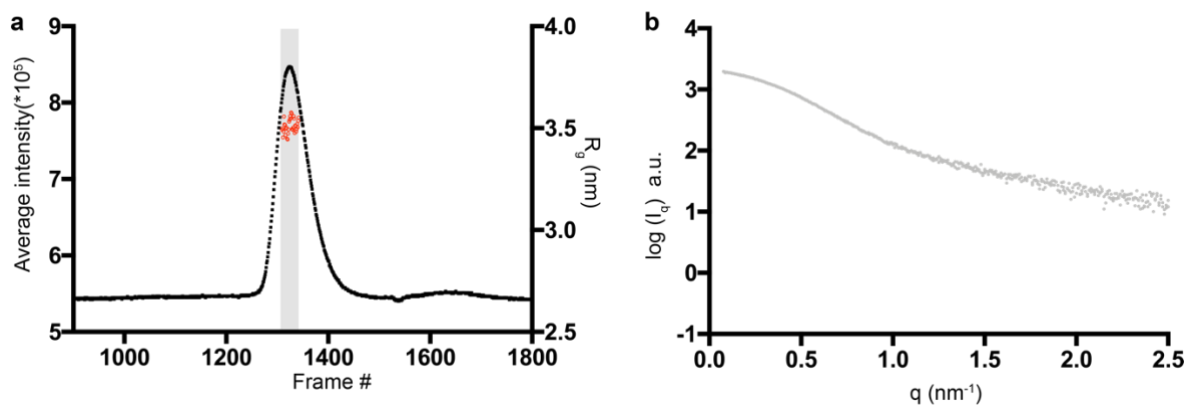

**Supplementary Fig. 9:** SAXS analysis of the *PfAlu* domain

**a** SEC-SAXS profile of *PfAlu* domain plotted according to frame number. Frames used for obtaining averaged data are highlighted and the radius of gyration is shown in red. **b** SAXS profile of *PfAlu* domain plotted as  $\log(I_q)$  versus  $q$ . a.u. represents arbitrary units.



### Supplementary Table 1

| Sample              | Average experimental molecular weight (kDa) | Theoretical molecular weight (kDa) |
|---------------------|---------------------------------------------|------------------------------------|
| <i>PfSRP9/14</i>    | 24±0.5                                      | 24.1                               |
| <i>PfAlu118 RNA</i> | 33.2±0.1                                    | 38.6                               |
| <i>PfAlu domain</i> | 55.6±0.1                                    | 62.7                               |

**Supplementary Table 1.** SEC-MALS derived average molecular weight

## Supplementary Table 2

| Data collection parameters                                   | <i>PfSRP9/14</i>               | <i>PfAlu76</i> RNA           | <i>PfAlu118</i> RNA            | <i>PfAlu</i> domain         |
|--------------------------------------------------------------|--------------------------------|------------------------------|--------------------------------|-----------------------------|
| Instrument                                                   | BM29 (ESRF, Grenoble)          | BM29 (ESRF, Grenoble)        | BM29 (ESRF, Grenoble)          | BM29 (ESRF, Grenoble)       |
| Beam geometry (mm <sup>2</sup> )                             | 0.7×0.7                        | 0.7×0.7                      | 0.7×0.7                        | 0.7×0.7                     |
| Wavelength (Å)                                               | 0.99                           | 0.99                         | 0.99                           | 0.99                        |
| <i>q</i> range (nm <sup>-1</sup> )                           | 0.03-5                         | 0.03-5                       | 0.03-5                         | 0.03-5                      |
| Exposure time (s)                                            | 5s<br>(10×0.5s)                | 10s<br>(20×0.5s)             | 10s (20×0.5s)                  | 1s ×2500 frames             |
| Temperature (°C)                                             | 20                             | 20                           | 20                             | 20                          |
| Concentration range measured (mg ml <sup>-1</sup> )          | 0.3 - 5                        | 0.2 - 1.8                    | 0.4 - 2.8                      | Unknown (SEC)               |
| Concentration used (mg ml <sup>-1</sup> )                    | 2.5                            | 0.45                         | 2.8                            | -                           |
| Structural parameters                                        |                                |                              |                                |                             |
| <i>R<sub>g</sub></i> (nm) (from <i>P(r)</i> )                | 2.1                            | 3.35                         | 3.33                           | 3.5                         |
| <i>R<sub>g</sub></i> (nm) (from Guinier)                     | 2.08±0.01                      | 3.34±0.02                    | 3.32±0.03                      | 3.50±0.05                   |
| <i>D<sub>max</sub></i> (nm)                                  | 7.2                            | 11.5                         | 11.8                           | 12                          |
| Porod volume estimate (nm <sup>3</sup> ) (from <i>P(r)</i> ) | 40.45                          | 38.31                        | 63.3                           | 119.47                      |
| Excluded volume estimate <sup>s</sup> (nm <sup>3</sup> )     | 48                             | 52                           | 79                             | 127                         |
| Molecular weight determination (kDa)                         |                                |                              |                                |                             |
| From volume of correlation ( <i>V<sub>c</sub></i> )          | 26.2                           | 26.7                         | 37.6                           | 62.6                        |
| From Bayesian assessment [credibility interval], probability | 23.7<br>[22.1, 24.7],<br>96.3% | 28.9<br>[27.9, 32],<br>92.5% | 37.7<br>[36.5, 40.7],<br>94.7% | 62.4<br>[58.8,68],<br>93.6% |
| Calculated <i>MW</i> from sequence                           | 24.1                           | 24.9                         | 38.6                           | 62.7                        |
| Software employed                                            |                                |                              |                                |                             |
| Primary data reduction                                       |                                | BsxCuBE                      |                                |                             |
| Data processing                                              | PRIMUS                         | PRIMUS                       | PRIMUS                         | CHROMIXS,<br>PRIMUS         |
| <i>Ab initio</i> analysis                                    | DAMMIF                         | DAMMIF                       | DAMMIF                         | MONSA                       |
| Validation, averaging and final refinement                   | DAMMAVERDAM<br>MIN             | DAMMAVER<br>DAMMIN           | DAMMAVER<br>DAMMIN             | -                           |
| 3D structure prediction                                      | -                              | FARFAR2                      | FARFAR2                        | -                           |
| Flexibility modeling                                         | -                              | SREFLEX                      | SREFLEX                        | -                           |
| Computation of model intensities                             |                                | CRY SOL                      |                                |                             |
| 3D graphics representations                                  |                                | UCSF Chimera                 |                                |                             |

**Supplementary Table 2:** SAXS data collection, processing and modeling statistics

### Supplementary Table 3

|                                         |              |
|-----------------------------------------|--------------|
| Microscope                              | Glacios      |
| Detector                                | Falcon3      |
| Magnification                           | 92,000       |
| Voltage (kV)                            | 200          |
| Electron exposure (e-/ Å <sup>2</sup> ) | 63.68        |
| Defocus range (μm)                      | -1.5 to -3.0 |
| Pixel size (Å)                          | 1.56         |
| Symmetry imposed                        | C1           |
| Initial particle images (no.)           | 94,291       |
| Final particle images (no.)             | 70,346       |
| Data collection software                | EPU          |
| Data processing software                | RELION-3.1   |

**Supplementary Table 3:** Cryo-EM data collection and processing statistics for *PfAlu118* RNA

### Supplementary Table 4

| No. of models | Constraints      |                     |                     | $\chi^2$             |                          |                          |
|---------------|------------------|---------------------|---------------------|----------------------|--------------------------|--------------------------|
|               | <i>PfSRP9/14</i> | <i>PfAlu118</i> RNA | <i>PfAlu</i> domain | $\chi^2_{PfSRP9/14}$ | $\chi^2_{PfAlu118\ RNA}$ | $\chi^2_{PfAlu\ domain}$ |
| 1             | Yes              | Yes                 | Yes                 | 0.99                 | 1.45                     | 1.29                     |
| 1             | Yes              | -                   | Yes                 | 0.902                | -                        | 1.22                     |
| 1             | -                | Yes                 | Yes                 | -                    | 1.4                      | 1.47                     |
| 10*           | Yes              | Yes                 | Yes                 | 1.03                 | 1.44                     | 1.32                     |

(\* $\chi^2$  averages of 10 independent runs are presented)

**Supplementary Table 4:** MONSA modeling of the *PfAlu* domain

## Supplementary References

- 1 Voorhees, R. M. & Hegde, R. S. Structures of the scanning and engaged states of the mammalian SRP-ribosome complex. *Elife* **4**, e07975 (2015).
- 2 Bousset, L. *et al.* Crystal structure of a signal recognition particle Alu domain in the elongation arrest conformation. *RNA* **20**, 1955-1962 (2014).
- 3 Rosenblad, M. A., Zwieb, C. & Samuelsson, T. Identification and comparative analysis of components from the signal recognition particle in protozoa and fungi. *BMC Genomics* **5**, 5 (2004).
- 4 Waterhouse, A. M., Procter, J. B., Martin, D. M., Clamp, M. & Barton, G. J. Jalview Version 2-- a multiple sequence alignment editor and analysis workbench. *Bioinformatics* **25**, 1189-1191 (2009).
- 5 Lakkaraju, A. K., Mary, C., Scherrer, A., Johnson, A. E. & Strub, K. SRP keeps polypeptides translocation-competent by slowing translation to match limiting ER-targeting sites. *Cell* **133**, 440-451 (2008).
- 6 Mary, C. *et al.* Residues in SRP9/14 essential for elongation arrest activity of the signal recognition particle define a positively charged functional domain on one side of the protein. *RNA* **16**, 969-979 (2010).
- 7 Watkins, A. M., Rangan, R. & Das, R. FARFAR2: Improved De Novo Rosetta Prediction of Complex Global RNA Folds. *Structure* **28**, 963-976 (2020).
- 8 Panjkovich, A. & Svergun, D. I. Deciphering conformational transitions of proteins by small angle X-ray scattering and normal mode analysis. *Phys Chem Chem Phys* **18**, 5707-5719 (2016).
- 9 Franke, D. *et al.* ATSAS 2.8: a comprehensive data analysis suite for small-angle scattering from macromolecular solutions. *J Appl Crystallogr* **50**, 1212-1225 (2017).
