# Supplementary material for: Structural analysis of the SRP Alu domain from Plasmodium falciparum reveals a non-canonical open conformation
Source: PubMed Central journal article supplement (PMC8137916; doi:10.1038/s42003-021-02132-y), 2021-05-20
Supplement: 42003_2021_2132_MOESM2_ESM.pdf [file 42003_2021_2132_MOESM2_ESM.pdf]

## Description of Additional Supplementary Files

File Name: Supplementary Data 1

Description: Source Data
